# Supplementary material
Source: PubMed Central journal article supplement (PMC4981075)
Supplement: DS_10.1177_1941738116644245_A1.pdf [file DS_10.1177_1941738116644245_A1.pdf]

## Appendix 1

**Table 1.** USA Baseball & Safety Advisory Committee guidelines

| Categories                                                      | Recommendations                                                                                                                                                                                                                                                                                                                                                                                                                                                                                                                                                                                                                                                                                                                                                                                                                                                                                                                                                                                                                                                                                                                                                                       |                                                                                               |                                                                                               |                     |                |  |  |                        |                         |                         |   |    |    |    |   |    |    |    |   |    |    |    |
|-----------------------------------------------------------------|---------------------------------------------------------------------------------------------------------------------------------------------------------------------------------------------------------------------------------------------------------------------------------------------------------------------------------------------------------------------------------------------------------------------------------------------------------------------------------------------------------------------------------------------------------------------------------------------------------------------------------------------------------------------------------------------------------------------------------------------------------------------------------------------------------------------------------------------------------------------------------------------------------------------------------------------------------------------------------------------------------------------------------------------------------------------------------------------------------------------------------------------------------------------------------------|-----------------------------------------------------------------------------------------------|-----------------------------------------------------------------------------------------------|---------------------|----------------|--|--|------------------------|-------------------------|-------------------------|---|----|----|----|---|----|----|----|---|----|----|----|
| Maximum number of pitches thrown according to the pitcher's age | <b>9- to 10-year-olds</b><br>50 per game<br>75 per week<br>1000 per season<br>2000 per year                                                                                                                                                                                                                                                                                                                                                                                                                                                                                                                                                                                                                                                                                                                                                                                                                                                                                                                                                                                                                                                                                           | <b>11- to 12-year-olds</b><br>75 per game<br>100 per week<br>1000 per season<br>3000 per year | <b>13- to 14-year-olds</b><br>75 per game<br>125 per game<br>1000 per season<br>3000 per year |                     |                |  |  |                        |                         |                         |   |    |    |    |   |    |    |    |   |    |    |    |
| Types of pitching                                               | Do not perform breaking pitching (eg, curveballs, sliders) until bones have matured (approximately 13 years of age).                                                                                                                                                                                                                                                                                                                                                                                                                                                                                                                                                                                                                                                                                                                                                                                                                                                                                                                                                                                                                                                                  |                                                                                               |                                                                                               |                     |                |  |  |                        |                         |                         |   |    |    |    |   |    |    |    |   |    |    |    |
| Pitching mechanics and physical condition                       | Should develop good mechanics as soon as possible and include physical conditioning exercises while growing.                                                                                                                                                                                                                                                                                                                                                                                                                                                                                                                                                                                                                                                                                                                                                                                                                                                                                                                                                                                                                                                                          |                                                                                               |                                                                                               |                     |                |  |  |                        |                         |                         |   |    |    |    |   |    |    |    |   |    |    |    |
| Multiple appearances                                            | Once the pitcher is out of the game, the pitcher should not pitch again.                                                                                                                                                                                                                                                                                                                                                                                                                                                                                                                                                                                                                                                                                                                                                                                                                                                                                                                                                                                                                                                                                                              |                                                                                               |                                                                                               |                     |                |  |  |                        |                         |                         |   |    |    |    |   |    |    |    |   |    |    |    |
| Showcases (exhibits to recruit players)                         | Should not participate.                                                                                                                                                                                                                                                                                                                                                                                                                                                                                                                                                                                                                                                                                                                                                                                                                                                                                                                                                                                                                                                                                                                                                               |                                                                                               |                                                                                               |                     |                |  |  |                        |                         |                         |   |    |    |    |   |    |    |    |   |    |    |    |
| Multiple leagues                                                | Do not play in 2 leagues when the seasons overlap.                                                                                                                                                                                                                                                                                                                                                                                                                                                                                                                                                                                                                                                                                                                                                                                                                                                                                                                                                                                                                                                                                                                                    |                                                                                               |                                                                                               |                     |                |  |  |                        |                         |                         |   |    |    |    |   |    |    |    |   |    |    |    |
| Playing year round                                              | Should not compete in the same sport for more than 9 months a year to give time to rest and recover. For at least 3 months, the pitcher should not play baseball nor participate in pitching practices or in any stressful activity that requires movement above the head level.                                                                                                                                                                                                                                                                                                                                                                                                                                                                                                                                                                                                                                                                                                                                                                                                                                                                                                      |                                                                                               |                                                                                               |                     |                |  |  |                        |                         |                         |   |    |    |    |   |    |    |    |   |    |    |    |
| Procedure to follow when reaching the pitching limit            | Once the pitcher reaches the maximum limit established for the age, the pitcher should be removed from the game and should not pitch again during that game.                                                                                                                                                                                                                                                                                                                                                                                                                                                                                                                                                                                                                                                                                                                                                                                                                                                                                                                                                                                                                          |                                                                                               |                                                                                               |                     |                |  |  |                        |                         |                         |   |    |    |    |   |    |    |    |   |    |    |    |
| Number of weekly games                                          | The pitcher should not pitch more than 2 games per week.                                                                                                                                                                                                                                                                                                                                                                                                                                                                                                                                                                                                                                                                                                                                                                                                                                                                                                                                                                                                                                                                                                                              |                                                                                               |                                                                                               |                     |                |  |  |                        |                         |                         |   |    |    |    |   |    |    |    |   |    |    |    |
| Rest days                                                       | The pitching limits are established according to the number of pitches thrown during a game: <table border="1" style="margin-left: auto; margin-right: auto;"> <thead> <tr> <th rowspan="2" style="background-color: #333; color: white;">Number of Rest Days</th> <th colspan="3" style="background-color: #333; color: white;">Pitcher Age, y</th> </tr> <tr> <th style="background-color: #333; color: white;">9-10 y<br/># of pitches</th> <th style="background-color: #333; color: white;">11-12 y<br/># of pitches</th> <th style="background-color: #333; color: white;">13-14 y<br/># of pitches</th> </tr> </thead> <tbody> <tr> <td style="text-align: center;">1</td> <td style="text-align: center;">21</td> <td style="text-align: center;">27</td> <td style="text-align: center;">30</td> </tr> <tr> <td style="text-align: center;">2</td> <td style="text-align: center;">34</td> <td style="text-align: center;">35</td> <td style="text-align: center;">36</td> </tr> <tr> <td style="text-align: center;">3</td> <td style="text-align: center;">43</td> <td style="text-align: center;">55</td> <td style="text-align: center;">56</td> </tr> </tbody> </table> |                                                                                               |                                                                                               | Number of Rest Days | Pitcher Age, y |  |  | 9-10 y<br># of pitches | 11-12 y<br># of pitches | 13-14 y<br># of pitches | 1 | 21 | 27 | 30 | 2 | 34 | 35 | 36 | 3 | 43 | 55 | 56 |
| Number of Rest Days                                             | Pitcher Age, y                                                                                                                                                                                                                                                                                                                                                                                                                                                                                                                                                                                                                                                                                                                                                                                                                                                                                                                                                                                                                                                                                                                                                                        |                                                                                               |                                                                                               |                     |                |  |  |                        |                         |                         |   |    |    |    |   |    |    |    |   |    |    |    |
|                                                                 | 9-10 y<br># of pitches                                                                                                                                                                                                                                                                                                                                                                                                                                                                                                                                                                                                                                                                                                                                                                                                                                                                                                                                                                                                                                                                                                                                                                | 11-12 y<br># of pitches                                                                       | 13-14 y<br># of pitches                                                                       |                     |                |  |  |                        |                         |                         |   |    |    |    |   |    |    |    |   |    |    |    |
| 1                                                               | 21                                                                                                                                                                                                                                                                                                                                                                                                                                                                                                                                                                                                                                                                                                                                                                                                                                                                                                                                                                                                                                                                                                                                                                                    | 27                                                                                            | 30                                                                                            |                     |                |  |  |                        |                         |                         |   |    |    |    |   |    |    |    |   |    |    |    |
| 2                                                               | 34                                                                                                                                                                                                                                                                                                                                                                                                                                                                                                                                                                                                                                                                                                                                                                                                                                                                                                                                                                                                                                                                                                                                                                                    | 35                                                                                            | 36                                                                                            |                     |                |  |  |                        |                         |                         |   |    |    |    |   |    |    |    |   |    |    |    |
| 3                                                               | 43                                                                                                                                                                                                                                                                                                                                                                                                                                                                                                                                                                                                                                                                                                                                                                                                                                                                                                                                                                                                                                                                                                                                                                                    | 55                                                                                            | 56                                                                                            |                     |                |  |  |                        |                         |                         |   |    |    |    |   |    |    |    |   |    |    |    |
| Pitching with pain                                              | The pitcher should stop pitching as soon as there are signs of pain in the arm. The parents should seek medical attention if the pain persists for 4 days or if the pain comes back immediately the next time he pitches.                                                                                                                                                                                                                                                                                                                                                                                                                                                                                                                                                                                                                                                                                                                                                                                                                                                                                                                                                             |                                                                                               |                                                                                               |                     |                |  |  |                        |                         |                         |   |    |    |    |   |    |    |    |   |    |    |    |
| Activities after a game                                         | The pitcher should not pitch again during the same day once out of the game.                                                                                                                                                                                                                                                                                                                                                                                                                                                                                                                                                                                                                                                                                                                                                                                                                                                                                                                                                                                                                                                                                                          |                                                                                               |                                                                                               |                     |                |  |  |                        |                         |                         |   |    |    |    |   |    |    |    |   |    |    |    |

**Table 2.** Administrative Order Number 2006-01<sup>10</sup>

| Categories                                                                | Recommendations                                                                                                                                                                                                                                                                                                                                                                                                                                                                                                                                                                                                                                                                                                                                                                                                                                                                                                                                                                                                                                                                                                                                                                                                                                                                                                                                                                                                                                                                                                                                                                                                                                                                                                                                                                                                                                                                                                                                                                                                                                                                                                             |                           |                                  |                            |                            |                            |    |       |           |                          |                           |                            |                            |                            |                            |   |    |    |    |    |    |    |   |    |    |    |    |    |    |   |    |    |    |    |    |    |   |    |    |    |    |    |    |
|---------------------------------------------------------------------------|-----------------------------------------------------------------------------------------------------------------------------------------------------------------------------------------------------------------------------------------------------------------------------------------------------------------------------------------------------------------------------------------------------------------------------------------------------------------------------------------------------------------------------------------------------------------------------------------------------------------------------------------------------------------------------------------------------------------------------------------------------------------------------------------------------------------------------------------------------------------------------------------------------------------------------------------------------------------------------------------------------------------------------------------------------------------------------------------------------------------------------------------------------------------------------------------------------------------------------------------------------------------------------------------------------------------------------------------------------------------------------------------------------------------------------------------------------------------------------------------------------------------------------------------------------------------------------------------------------------------------------------------------------------------------------------------------------------------------------------------------------------------------------------------------------------------------------------------------------------------------------------------------------------------------------------------------------------------------------------------------------------------------------------------------------------------------------------------------------------------------------|---------------------------|----------------------------------|----------------------------|----------------------------|----------------------------|----|-------|-----------|--------------------------|---------------------------|----------------------------|----------------------------|----------------------------|----------------------------|---|----|----|----|----|----|----|---|----|----|----|----|----|----|---|----|----|----|----|----|----|---|----|----|----|----|----|----|
| Exercise program                                                          | The coach should implement a stretching and warm-up program for each member of the team before and after a game with the purpose of acquiring flexibility, resistance, and strength.                                                                                                                                                                                                                                                                                                                                                                                                                                                                                                                                                                                                                                                                                                                                                                                                                                                                                                                                                                                                                                                                                                                                                                                                                                                                                                                                                                                                                                                                                                                                                                                                                                                                                                                                                                                                                                                                                                                                        |                           |                                  |                            |                            |                            |    |       |           |                          |                           |                            |                            |                            |                            |   |    |    |    |    |    |    |   |    |    |    |    |    |    |   |    |    |    |    |    |    |   |    |    |    |    |    |    |
| Record keeper                                                             | Each team should have a record keeper who will write down the number of pitches thrown in the game.                                                                                                                                                                                                                                                                                                                                                                                                                                                                                                                                                                                                                                                                                                                                                                                                                                                                                                                                                                                                                                                                                                                                                                                                                                                                                                                                                                                                                                                                                                                                                                                                                                                                                                                                                                                                                                                                                                                                                                                                                         |                           |                                  |                            |                            |                            |    |       |           |                          |                           |                            |                            |                            |                            |   |    |    |    |    |    |    |   |    |    |    |    |    |    |   |    |    |    |    |    |    |   |    |    |    |    |    |    |
| Maximum number of pitches thrown in a game according to the pitcher's age | <table border="1" data-bbox="570 432 1325 617"> <thead> <tr> <th data-bbox="570 432 865 506">Age, y</th> <th data-bbox="865 432 1325 506">Maximum Number of Pitches Thrown</th> </tr> </thead> <tbody> <tr> <td data-bbox="570 506 865 541">9-10</td> <td data-bbox="865 506 1325 541">58</td> </tr> <tr> <td data-bbox="570 541 865 577">11-12</td> <td data-bbox="865 541 1325 577">68</td> </tr> <tr> <td data-bbox="570 577 865 617">13-14</td> <td data-bbox="865 577 1325 617">76</td> </tr> </tbody> </table>                                                                                                                                                                                                                                                                                                                                                                                                                                                                                                                                                                                                                                                                                                                                                                                                                                                                                                                                                                                                                                                                                                                                                                                                                                                                                                                                                                                                                                                                                                                                                                                                        | Age, y                    | Maximum Number of Pitches Thrown | 9-10                       | 58                         | 11-12                      | 68 | 13-14 | 76        |                          |                           |                            |                            |                            |                            |   |    |    |    |    |    |    |   |    |    |    |    |    |    |   |    |    |    |    |    |    |   |    |    |    |    |    |    |
| Age, y                                                                    | Maximum Number of Pitches Thrown                                                                                                                                                                                                                                                                                                                                                                                                                                                                                                                                                                                                                                                                                                                                                                                                                                                                                                                                                                                                                                                                                                                                                                                                                                                                                                                                                                                                                                                                                                                                                                                                                                                                                                                                                                                                                                                                                                                                                                                                                                                                                            |                           |                                  |                            |                            |                            |    |       |           |                          |                           |                            |                            |                            |                            |   |    |    |    |    |    |    |   |    |    |    |    |    |    |   |    |    |    |    |    |    |   |    |    |    |    |    |    |
| 9-10                                                                      | 58                                                                                                                                                                                                                                                                                                                                                                                                                                                                                                                                                                                                                                                                                                                                                                                                                                                                                                                                                                                                                                                                                                                                                                                                                                                                                                                                                                                                                                                                                                                                                                                                                                                                                                                                                                                                                                                                                                                                                                                                                                                                                                                          |                           |                                  |                            |                            |                            |    |       |           |                          |                           |                            |                            |                            |                            |   |    |    |    |    |    |    |   |    |    |    |    |    |    |   |    |    |    |    |    |    |   |    |    |    |    |    |    |
| 11-12                                                                     | 68                                                                                                                                                                                                                                                                                                                                                                                                                                                                                                                                                                                                                                                                                                                                                                                                                                                                                                                                                                                                                                                                                                                                                                                                                                                                                                                                                                                                                                                                                                                                                                                                                                                                                                                                                                                                                                                                                                                                                                                                                                                                                                                          |                           |                                  |                            |                            |                            |    |       |           |                          |                           |                            |                            |                            |                            |   |    |    |    |    |    |    |   |    |    |    |    |    |    |   |    |    |    |    |    |    |   |    |    |    |    |    |    |
| 13-14                                                                     | 76                                                                                                                                                                                                                                                                                                                                                                                                                                                                                                                                                                                                                                                                                                                                                                                                                                                                                                                                                                                                                                                                                                                                                                                                                                                                                                                                                                                                                                                                                                                                                                                                                                                                                                                                                                                                                                                                                                                                                                                                                                                                                                                          |                           |                                  |                            |                            |                            |    |       |           |                          |                           |                            |                            |                            |                            |   |    |    |    |    |    |    |   |    |    |    |    |    |    |   |    |    |    |    |    |    |   |    |    |    |    |    |    |
| Procedure to be followed when the pitching limit is reached               | If the pitcher reaches the pitching limit allowed, the record keeper should notify the main umpire and the coach, who should remove the pitcher and bring in a new pitcher.                                                                                                                                                                                                                                                                                                                                                                                                                                                                                                                                                                                                                                                                                                                                                                                                                                                                                                                                                                                                                                                                                                                                                                                                                                                                                                                                                                                                                                                                                                                                                                                                                                                                                                                                                                                                                                                                                                                                                 |                           |                                  |                            |                            |                            |    |       |           |                          |                           |                            |                            |                            |                            |   |    |    |    |    |    |    |   |    |    |    |    |    |    |   |    |    |    |    |    |    |   |    |    |    |    |    |    |
| Pitching limit per week                                                   | No pitcher should pitch more than 2 games per week.                                                                                                                                                                                                                                                                                                                                                                                                                                                                                                                                                                                                                                                                                                                                                                                                                                                                                                                                                                                                                                                                                                                                                                                                                                                                                                                                                                                                                                                                                                                                                                                                                                                                                                                                                                                                                                                                                                                                                                                                                                                                         |                           |                                  |                            |                            |                            |    |       |           |                          |                           |                            |                            |                            |                            |   |    |    |    |    |    |    |   |    |    |    |    |    |    |   |    |    |    |    |    |    |   |    |    |    |    |    |    |
| Types of pitching                                                         | No pitcher under 13 years should throw curveballs.                                                                                                                                                                                                                                                                                                                                                                                                                                                                                                                                                                                                                                                                                                                                                                                                                                                                                                                                                                                                                                                                                                                                                                                                                                                                                                                                                                                                                                                                                                                                                                                                                                                                                                                                                                                                                                                                                                                                                                                                                                                                          |                           |                                  |                            |                            |                            |    |       |           |                          |                           |                            |                            |                            |                            |   |    |    |    |    |    |    |   |    |    |    |    |    |    |   |    |    |    |    |    |    |   |    |    |    |    |    |    |
| Rest days                                                                 | <p data-bbox="475 798 1416 877">Each pitcher should have rest days, according to the number of pitches thrown during a game.</p> <table border="1" data-bbox="488 932 1349 1199"> <thead> <tr> <th data-bbox="488 932 740 989"></th> <th colspan="6" data-bbox="740 932 1349 968">Pitcher Age, y</th> </tr> <tr> <th data-bbox="488 989 740 1073">Rest Days</th> <th data-bbox="740 989 837 1073">7 – 8<br/># of<br/>pitches</th> <th data-bbox="837 989 935 1073">9 – 10<br/># of<br/>pitches</th> <th data-bbox="935 989 1032 1073">11 – 12<br/># of<br/>pitches</th> <th data-bbox="1032 989 1130 1073">13 – 14<br/># of<br/>pitches</th> <th data-bbox="1130 989 1227 1073">15 – 16<br/># of<br/>pitches</th> <th data-bbox="1227 989 1349 1073">17 – 18<br/># of<br/>pitches</th> </tr> </thead> <tbody> <tr> <td data-bbox="488 1073 740 1108">1</td> <td data-bbox="740 1073 837 1108">18</td> <td data-bbox="837 1073 935 1108">21</td> <td data-bbox="935 1073 1032 1108">27</td> <td data-bbox="1032 1073 1130 1108">30</td> <td data-bbox="1130 1073 1227 1108">25</td> <td data-bbox="1227 1073 1349 1108">27</td> </tr> <tr> <td data-bbox="488 1108 740 1144">2</td> <td data-bbox="740 1108 837 1144">28</td> <td data-bbox="837 1108 935 1144">34</td> <td data-bbox="935 1108 1032 1144">35</td> <td data-bbox="1032 1108 1130 1144">36</td> <td data-bbox="1130 1108 1227 1144">38</td> <td data-bbox="1227 1108 1349 1144">45</td> </tr> <tr> <td data-bbox="488 1144 740 1180">3</td> <td data-bbox="740 1144 837 1180">38</td> <td data-bbox="837 1144 935 1180">43</td> <td data-bbox="935 1144 1032 1180">55</td> <td data-bbox="1032 1144 1130 1180">56</td> <td data-bbox="1130 1144 1227 1180">62</td> <td data-bbox="1227 1144 1349 1180">62</td> </tr> <tr> <td data-bbox="488 1180 740 1215">4</td> <td data-bbox="740 1180 837 1215">45</td> <td data-bbox="837 1180 935 1215">51</td> <td data-bbox="935 1180 1032 1215">58</td> <td data-bbox="1032 1180 1130 1215">70</td> <td data-bbox="1130 1180 1227 1215">77</td> <td data-bbox="1227 1180 1349 1215">89</td> </tr> </tbody> </table> |                           | Pitcher Age, y                   |                            |                            |                            |    |       | Rest Days | 7 – 8<br># of<br>pitches | 9 – 10<br># of<br>pitches | 11 – 12<br># of<br>pitches | 13 – 14<br># of<br>pitches | 15 – 16<br># of<br>pitches | 17 – 18<br># of<br>pitches | 1 | 18 | 21 | 27 | 30 | 25 | 27 | 2 | 28 | 34 | 35 | 36 | 38 | 45 | 3 | 38 | 43 | 55 | 56 | 62 | 62 | 4 | 45 | 51 | 58 | 70 | 77 | 89 |
|                                                                           | Pitcher Age, y                                                                                                                                                                                                                                                                                                                                                                                                                                                                                                                                                                                                                                                                                                                                                                                                                                                                                                                                                                                                                                                                                                                                                                                                                                                                                                                                                                                                                                                                                                                                                                                                                                                                                                                                                                                                                                                                                                                                                                                                                                                                                                              |                           |                                  |                            |                            |                            |    |       |           |                          |                           |                            |                            |                            |                            |   |    |    |    |    |    |    |   |    |    |    |    |    |    |   |    |    |    |    |    |    |   |    |    |    |    |    |    |
| Rest Days                                                                 | 7 – 8<br># of<br>pitches                                                                                                                                                                                                                                                                                                                                                                                                                                                                                                                                                                                                                                                                                                                                                                                                                                                                                                                                                                                                                                                                                                                                                                                                                                                                                                                                                                                                                                                                                                                                                                                                                                                                                                                                                                                                                                                                                                                                                                                                                                                                                                    | 9 – 10<br># of<br>pitches | 11 – 12<br># of<br>pitches       | 13 – 14<br># of<br>pitches | 15 – 16<br># of<br>pitches | 17 – 18<br># of<br>pitches |    |       |           |                          |                           |                            |                            |                            |                            |   |    |    |    |    |    |    |   |    |    |    |    |    |    |   |    |    |    |    |    |    |   |    |    |    |    |    |    |
| 1                                                                         | 18                                                                                                                                                                                                                                                                                                                                                                                                                                                                                                                                                                                                                                                                                                                                                                                                                                                                                                                                                                                                                                                                                                                                                                                                                                                                                                                                                                                                                                                                                                                                                                                                                                                                                                                                                                                                                                                                                                                                                                                                                                                                                                                          | 21                        | 27                               | 30                         | 25                         | 27                         |    |       |           |                          |                           |                            |                            |                            |                            |   |    |    |    |    |    |    |   |    |    |    |    |    |    |   |    |    |    |    |    |    |   |    |    |    |    |    |    |
| 2                                                                         | 28                                                                                                                                                                                                                                                                                                                                                                                                                                                                                                                                                                                                                                                                                                                                                                                                                                                                                                                                                                                                                                                                                                                                                                                                                                                                                                                                                                                                                                                                                                                                                                                                                                                                                                                                                                                                                                                                                                                                                                                                                                                                                                                          | 34                        | 35                               | 36                         | 38                         | 45                         |    |       |           |                          |                           |                            |                            |                            |                            |   |    |    |    |    |    |    |   |    |    |    |    |    |    |   |    |    |    |    |    |    |   |    |    |    |    |    |    |
| 3                                                                         | 38                                                                                                                                                                                                                                                                                                                                                                                                                                                                                                                                                                                                                                                                                                                                                                                                                                                                                                                                                                                                                                                                                                                                                                                                                                                                                                                                                                                                                                                                                                                                                                                                                                                                                                                                                                                                                                                                                                                                                                                                                                                                                                                          | 43                        | 55                               | 56                         | 62                         | 62                         |    |       |           |                          |                           |                            |                            |                            |                            |   |    |    |    |    |    |    |   |    |    |    |    |    |    |   |    |    |    |    |    |    |   |    |    |    |    |    |    |
| 4                                                                         | 45                                                                                                                                                                                                                                                                                                                                                                                                                                                                                                                                                                                                                                                                                                                                                                                                                                                                                                                                                                                                                                                                                                                                                                                                                                                                                                                                                                                                                                                                                                                                                                                                                                                                                                                                                                                                                                                                                                                                                                                                                                                                                                                          | 51                        | 58                               | 70                         | 77                         | 89                         |    |       |           |                          |                           |                            |                            |                            |                            |   |    |    |    |    |    |    |   |    |    |    |    |    |    |   |    |    |    |    |    |    |   |    |    |    |    |    |    |
| Record of lesions                                                         | Each team should keep a record of lesions, and a copy will be sent to the Department of Recreation and Sports at the end of each game season.                                                                                                                                                                                                                                                                                                                                                                                                                                                                                                                                                                                                                                                                                                                                                                                                                                                                                                                                                                                                                                                                                                                                                                                                                                                                                                                                                                                                                                                                                                                                                                                                                                                                                                                                                                                                                                                                                                                                                                               |                           |                                  |                            |                            |                            |    |       |           |                          |                           |                            |                            |                            |                            |   |    |    |    |    |    |    |   |    |    |    |    |    |    |   |    |    |    |    |    |    |   |    |    |    |    |    |    |

**Table 3.** Sociodemographic profile

|                                                        | <b>Frequency, n</b> | <b>Ratio, %</b> |
|--------------------------------------------------------|---------------------|-----------------|
| <b>Sex</b>                                             |                     |                 |
| Male                                                   | 35                  | 100             |
| <b>Maximum school level</b>                            |                     |                 |
| High school                                            | 15                  | 42.86           |
| Associate degree                                       | 3                   | 8.57            |
| Bachelor's                                             | 15                  | 42.86           |
| Master's                                               | 2                   | 5.71            |
| <b>Certification as coach<sup>a</sup></b>              |                     |                 |
| Yes                                                    | 15                  | 42.86           |
| No                                                     | 20                  | 57.14           |
| <b>Training in good pitching mechanics<sup>b</sup></b> |                     |                 |
| Workshops                                              | 23                  | 65.71           |
| Television                                             | 10                  | 28.57           |
| Online                                                 | 24                  | 68.57           |
| Books                                                  | 17                  | 48.57           |
| Personal experience                                    | 4                   | 11.43           |

<sup>a</sup>Refers to a valid baseball certification as coach, provided by the Department of Recreation and Sports of Puerto Rico.

<sup>b</sup>The coaches could have selected more than 1 method of training in good pitching mechanics.

**Table 4.** Compliance with lesion prevention guides reported by coaches (n = 35)

|                                  | All coaches                              |                                           |          |
|----------------------------------|------------------------------------------|-------------------------------------------|----------|
|                                  | <b>Total Recommendations<sup>a</sup></b> | <b>Mean Recommendations Complied With</b> | <b>%</b> |
| Administrative Order No. 2006-01 | 20                                       | 14                                        | 70.0     |
| USA Baseball                     | 19                                       | 13.89                                     | 73.11    |

<sup>a</sup>Total number of recommendations provided by each guide..

**Table 5.** Compliance reported by coaches according to the recommendations to prevent lesions in juvenile pitchers (n = 35)

| Compliance by Recommendation and Source                              | Total Coaches in Compliance | %     |
|----------------------------------------------------------------------|-----------------------------|-------|
| <b>Administrative Order</b>                                          |                             |       |
| Official record keeper                                               | 34                          | 97.14 |
| Is there anyone in charge of notifying the pitching limit?           | 34                          | 97.14 |
| Who is in charge of notifying pitching limit?                        | 19                          | 54.29 |
| Who should be notified when the pitcher reaches the limit?           | 28                          | 80    |
| Is the weekly number of games limit established?                     | 28                          | 80    |
| Weekly number of games limited                                       | 2                           | 5.71  |
| Are rest days established according to the number of pitches thrown? | 34                          | 97.14 |
| Rest days after 43 pitches thrown                                    | 25                          | 71.43 |
| Rest days after 51 pitches thrown                                    | 21                          | 60    |
| Does the team keep a record of lesions?                              | 20                          | 57.14 |
| Procedure to be followed with the record of lesions                  | 1                           | 2.86  |
| <b>USA Baseball</b>                                                  |                             |       |
| Education on good pitching mechanics                                 | 35                          | 100   |
| Participation in showcases                                           | 24                          | 68.57 |
| Playing in more than 1 league during a season                        | 27                          | 77.14 |
| How many months does a season last?                                  | 34                          | 97.14 |
| How many months does the off-season last?                            | 26                          | 74.29 |
| Procedure when the pitcher expresses pain <sup>a</sup>               | 32                          | 94.12 |
| Education to parents for pain management                             | 33                          | 94.29 |
| Education to pitchers about what to do after a game                  | 32                          | 91.43 |
| Recommendations after pitching in a game                             | 12                          | 34.29 |
| Are pitchers allowed to throw sliders?                               | 34                          | 97.14 |
| <b>Administrative Order and USA Baseball</b>                         |                             |       |
| Do you establish a pitching limit per game?                          | 34                          | 97.14 |
| Established limit for the number of pitches thrown per game          | 17                          | 48.57 |
| Procedure once the pitching limit is reached                         | 32                          | 91.43 |
| Are pitchers allowed to throw curveballs?                            | 32                          | 91.43 |
| Do you include warm-up exercises?                                    | 35                          | 100   |
| Do you include stretching exercises?                                 | 34                          | 97.14 |

|                                         |    |       |
|-----------------------------------------|----|-------|
| Do you include strengthening exercises? | 30 | 85.71 |
| Do you include aerobic exercises?       | 29 | 82.86 |
| Do you include cooling down exercises?  | 26 | 74.29 |

<sup>a</sup>For this recommendation, n = 34.
