# Supplementary material
Source: PubMed Central journal article supplement (PMC4981075)
Supplement: DS_10.1177_1941738116644245_A2Spanish.pdf [file DS_10.1177_1941738116644245_A2Spanish.pdf]

UNIVERSIDAD DE PUERTO RICO  
RECINTO DE CIENCIAS MÉDICAS  
ESCUELA DE PROFESIONES DE LA SALUD  
DEPARTAMENTO DE ESTUDIOS GRADUADOS  
PROGRAMA DE TERAPIA FÍSICA

**Título del Proyecto:** Cumplimiento con las medidas de prevención de lesiones en lanzadores: encuesta a entrenadores de las categorías de 9 a 14 años de Pequeñas Ligas de Puerto Rico

**CATEGORÍA DE EDAD: 9-10 AÑOS**

**Instrucciones:**

Este cuestionario contiene preguntas acerca de las prácticas que usted lleva a cabo para prevenir lesiones en los lanzadores.

Conteste todas las preguntas haciendo un círculo o una (X) en la premisa que mejor describa su práctica en el último año.

Responda las preguntas de este cuestionario de acuerdo a la categoría de edad que usted entrena actualmente.

1. ¿Su equipo asigna un anotador que cuente los lanzamientos de los lanzadores?

☐ Sí    ☐ No

2. ¿Se establece algún límite por juego a la cantidad de lanzamientos que puede realizar el lanzador?

☐ Sí    ☐ No (*pase a la pregunta 8*)

3. ¿Cuál es el límite establecido?

\_\_\_\_\_  
(cantidad de lanzamientos)

4. ¿Hay alguna persona encargada de notificar cuando el lanzador llegó al límite de lanzamientos?

☐ Sí    ☐ No (*pase a la pregunta 8*)

5. En los torneos regulares, ¿quién está encargado de notificar que el lanzador llegó al límite de lanzamientos?

**Seleccione solo una respuesta.**

- a. El entrenador del equipo del lanzador
- b. El entrenador del equipo contrario
- c. El árbitro
- d. El anotador
- e. Otro (especifique)\_\_\_\_\_

6. ¿A quién se le debe notificar que el lanzador llegó al límite de lanzamientos?

**Seleccione solo una respuesta.**

- a. Sólo al árbitro
- b. Sólo al entrenador del equipo del lanzador
- c. Sólo al entrenador del equipo contrario
- d. Al árbitro y a ambos entrenadores
- e. Otro (especifique)\_\_\_\_\_

7. ¿Cuál es el procedimiento a seguir una vez el lanzador llega al límite establecido?

**Seleccione solo una respuesta.**

- a. El lanzador es removido del juego y no puede volver a lanzar en ese juego, pero puede continuar jugando en otra posición que no sea la de lanzador ni la de receptor.
- b. El lanzador es removido del juego y puede volver a lanzar luego de descansar durante 1 entrada.
- c. El lanzador es removido del juego y puede volver a lanzar luego de descansar durante 2 entradas.
- d. El lanzador es removido del juego y puede volver a lanzar luego de descansar durante 3 entradas.
- e. Otro (especifique)\_\_\_\_\_

8. ¿Se establece algún límite semanal a la cantidad de juegos en los que puede lanzar el lanzador?

☐ Sí      ☐ No (*pase a la pregunta 10*)

9. ¿Cuál es el límite establecido?

**Seleccione solo una respuesta.**

- a. Un juego a la semana
- b. Dos juegos por semana
- c. Tres juegos por semana
- d. Cuatro juegos por semana
- e. Otro (especifique)\_\_\_\_\_

10. ¿Se establecen días de descanso al lanzador según la cantidad de lanzamientos que realizó?

- ☐ Sí    ☐ No (*pase a la pregunta 13*)

11. Se le asignará al menos \_\_\_\_\_ día(s) de descanso al lanzador que haya realizado 43 lanzamientos en un juego:

- a. 1 día
- b. 2 días
- c. 3 días
- d. 4 días
- e. Otro (especifique) \_\_\_\_\_

12. Se le asignará al menos \_\_\_\_\_ día(s) de descanso al lanzador que haya realizado 51 lanzamientos en un juego:

- a. 1 día
- b. 2 días
- c. 3 días
- d. 4 días
- e. Otro (especifique) \_\_\_\_\_

13. ¿Se les permite a los lanzadores tirar curvas?

- ☐ Sí    ☐ No

14. ¿Se les permite a los lanzadores tirar “sliders”?

- ☐ Sí    ☐ No

15. ¿El equipo lleva un registro de lesiones durante la temporada?

- ☐ Sí    ☐ No (*pase a la pregunta 17*)

16. Con relación al registro, ¿cuál es el procedimiento a seguir una vez se acaba la temporada?

**Seleccione solo una respuesta.**

- a. Solo guardarlo en un archivo para uso del equipo
- b. Enviar copia al Departamento de Recreación y Deportes.
- c. Enviar copia al Departamento de Salud.
- d. Enviar copia a la oficina de Little League Baseball.
- e. Otro (especifique) \_\_\_\_\_

17. ¿Usted o algún miembro de su equipo educa a los lanzadores para desarrollar una buena mecánica de lanzamiento (“wind up”)?

☐ Sí    ☐ No

18. ¿Algún lanzador de su equipo participa en prácticas para demostrarle sus habilidades a reclutadores de otras organizaciones (“showcases”) o a entrenadores de categorías de edad mayor de 10 años?

☐ Sí    ☐ No    ☐ No sé

19. ¿Algún lanzador de su equipo juega en más de una liga durante la temporada?

☐ Sí    ☐ No    ☐ No sé

20. ¿Cuántos meses dura una temporada de juego?

\_\_\_\_\_  
(cantidad de meses)

21. ¿Cuántos meses dura la temporada de descanso (tiempo sin juegos)?

\_\_\_\_\_  
(cantidad de meses)

22. ¿Cuál es el procedimiento a seguir cuando un lanzador expresa o muestra signos de dolor?

**Seleccione solo una respuesta.**

- a. Permitir que el lanzador siga tirando, pero poniéndole hielo entre cada entrada.
- b. Remover al lanzador del juego inmediatamente.
- c. Preguntarle al lanzador si se siente bien para continuar tirando.
- d. Permitir que el lanzador descanse varias entradas hasta que se alivie el dolor y volverlo a poner cuando se sienta mejor.
- e. Otro (especifique)\_\_\_\_\_

23. ¿Le ofrece alguna educación a los padres de los lanzadores con relación al manejo del dolor en su brazo al tirar o el dolor que persiste luego de haber lanzado en el juego?

☐ Sí    ☐ No

24. ¿Educa a los lanzadores sobre lo que debe y no debe hacer luego de un juego?

☐ Sí    ☐ No (*pase a la pregunta 26*)

25. ¿Qué recomendaciones le provee a los lanzadores después de haber lanzado en un juego?

**Marque todas las que apliquen:**

- ☐ Ponerse hielo para aliviar dolor
- ☐ Cargar objetos pesados para fortalecer el brazo
- ☐ No realizar lanzamientos después del juego
- ☐ Hacer ejercicios de estiramiento
- ☐ Otros (especifique) \_\_\_\_\_

26. Como parte de su entrenamiento a los lanzadores, ¿incluye ejercicios de calentamiento antes de cada práctica y cada juego?

☐ Sí    ☐ No (*pase a la pregunta 28*)

27. Seleccione los ejercicios de calentamiento que realiza con los lanzadores. Incluya:

- tipo de ejercicio de calentamiento que realiza (Ej: caminar, correr)
- por cuánto tiempo realiza cada ejercicio de calentamiento (Ej: número de segundos o minutos que calienta)

| Tipo de ejercicio de calentamiento                         | Tiempo (cantidad de segundos o minutos) |
|------------------------------------------------------------|-----------------------------------------|
| <b>Marque todos los que apliquen:</b>                      |                                         |
| <input type="checkbox"/> “jumping jacks”                   |                                         |
| <input type="checkbox"/> trotar                            |                                         |
| <input type="checkbox"/> caminar                           |                                         |
| <input type="checkbox"/> correr                            |                                         |
| <input type="checkbox"/> otro (especifique) _____<br>_____ |                                         |

28. Como parte de su entrenamiento a los lanzadores, ¿incluye ejercicios de estiramiento antes y después de cada práctica y cada juego?

☐ Sí      ☐ No (*pase a la pregunta 30*)

29. Seleccione los ejercicios de estiramiento que realiza con los lanzadores. Incluya:

- articulaciones del cuerpo que estira (Ej: hombro, codo, rodilla, mano)
- por cuánto tiempo realiza cada estiramiento (Ej: número de segundos o minutos que estira)
- tipo de estiramiento
- forma en la que realiza el estiramiento

| Articulaciones del cuerpo que estira                                                                                                                                                                                                                                                                                                                                                                                                                   | Tiempo (cantidad de segundos o minutos) | Tipo de estiramiento (Ejemplo: estiramiento estático= se alarga la parte del cuerpo y se sostiene la posición; estiramiento balístico= se realiza movimientos de rebote para ir alargando la parte del cuerpo) | Forma en que realiza el estiramiento (Ejemplo: si el estiramiento lo realiza el lanzador por sí mismo (Activo) o si lo asiste otra persona (activo-asistido)) |
|--------------------------------------------------------------------------------------------------------------------------------------------------------------------------------------------------------------------------------------------------------------------------------------------------------------------------------------------------------------------------------------------------------------------------------------------------------|-----------------------------------------|----------------------------------------------------------------------------------------------------------------------------------------------------------------------------------------------------------------|---------------------------------------------------------------------------------------------------------------------------------------------------------------|
| <b>Marque todas las que apliquen:</b><br><br><input type="checkbox"/> cuello<br><input type="checkbox"/> hombro<br><input type="checkbox"/> codo<br><input type="checkbox"/> muñeca<br><input type="checkbox"/> espalda<br><input type="checkbox"/> cintura<br><input type="checkbox"/> cadera<br><input type="checkbox"/> rodilla<br><input type="checkbox"/> tobillo<br><input type="checkbox"/> otros (especifique) ____<br>_____<br>_____<br>_____ |                                         | <input type="checkbox"/> estático<br><input type="checkbox"/> balístico                                                                                                                                        | <input type="checkbox"/> activo<br><input type="checkbox"/> activo-asistido                                                                                   |

30. Como parte de su entrenamiento a los lanzadores en una práctica, ¿incluye ejercicios de fortalecimiento?

- ☐ Sí      ☐ No (*pase a la pregunta 32*)

31. Seleccione los ejercicios de fortalecimiento que realiza con los lanzadores. Indique:

- tipo de ejercicio de fortalecimiento (Ej: “push-ups”, abdominales)
- cuántas veces a la semana realiza los ejercicios de fortalecimiento (Ej: 1 vez a la semana, 5 veces a la semana)
- cantidad de repeticiones (Ej: 5 repeticiones, 30 repeticiones)
- cantidad de “sets” (Ej: 5 “sets”, 8 “sets”)

| Tipo de ejercicio de fortalecimiento                                                                                                                  | Veces a la semana | Cantidad de Repeticiones | Cantidad de “Sets” |
|-------------------------------------------------------------------------------------------------------------------------------------------------------|-------------------|--------------------------|--------------------|
| <b>Marque todos los que apliquen:</b>                                                                                                                 |                   |                          |                    |
| <input type="checkbox"/> “push-ups”                                                                                                                   |                   |                          |                    |
| <input type="checkbox"/> abdominales                                                                                                                  |                   |                          |                    |
| <input type="checkbox"/> “pull-ups”                                                                                                                   |                   |                          |                    |
| <input type="checkbox"/> pesas libres (especificar para qué parte del cuerpo las utiliza y cuánto peso utiliza) _____<br>_____<br>_____<br>_____      |                   |                          |                    |
| <input type="checkbox"/> máquinas de pesas (especificar para qué parte del cuerpo las utiliza y cuánto peso utiliza) _____<br>_____<br>_____<br>_____ |                   |                          |                    |
| <input type="checkbox"/> otros (especifique) _____<br>_____<br>_____<br>_____                                                                         |                   |                          |                    |

32. Como parte de su entrenamiento a los lanzadores en una práctica, ¿incluye ejercicios aeróbicos? (Un ejercicio aeróbico es un ejercicio donde se respira más rápido de lo que se respira en reposo.)

☐ Sí      ☐ No (*pase a la pregunta 34*)

33. Seleccione los ejercicios aeróbicos que realiza con los lanzadores. Indique:

- tipo de ejercicio aeróbico (Ej: caminar, saltar la cuica)
- cuántas veces a la semana realiza los ejercicios aeróbicos (Ej: 1 vez a la semana, 7 veces a la semana)
- por cuánto tiempo realiza los ejercicios aeróbicos (Ej: 5 minutos, 10 minutos)

| Tipo de ejercicio aeróbico                                                   | Veces a la semana | Tiempo (cantidad de segundos o minutos) |
|------------------------------------------------------------------------------|-------------------|-----------------------------------------|
| <b>Marque todas las que apliquen:</b>                                        |                   |                                         |
| <input type="checkbox"/> correr                                              |                   |                                         |
| <input type="checkbox"/> caminar                                             |                   |                                         |
| <input type="checkbox"/> saltar la cuica                                     |                   |                                         |
| <input type="checkbox"/> correr bicicleta                                    |                   |                                         |
| <input type="checkbox"/> otro (especifique) _____<br>_____<br>_____<br>_____ |                   |                                         |

34. Como parte de su entrenamiento a los lanzadores, ¿incluye ejercicios de enfriamiento después de cada práctica y cada juego? (Un ejercicio de enfriamiento se define como un tipo de ejercicio leve que se realiza luego de un tipo de actividad física extenuante con el propósito de permitirle al cuerpo regresar a su estado fisiológico normal de forma gradual.)

☐ Sí      ☐ No (*pase a la pregunta 36*)

35. Seleccione los ejercicios de enfriamiento que realiza con los lanzadores. Incluya:

- tipo de ejercicio de enfriamiento (Ej: trotar, caminar)
- por cuánto tiempo realiza los ejercicios de enfriamiento (Ej: 15 minutos, 20 minutos)

| Tipo de ejercicio de enfriamiento                   | Tiempo (cantidad de segundos o minutos) |
|-----------------------------------------------------|-----------------------------------------|
| <b>Marque todas las que apliquen:</b>               |                                         |
| <input type="checkbox"/> “jumping jacks”            |                                         |
| <input type="checkbox"/> trotar                     |                                         |
| <input type="checkbox"/> caminar                    |                                         |
| <input type="checkbox"/> estirar                    |                                         |
| <input type="checkbox"/> “push-ups”                 |                                         |
| <input type="checkbox"/> otro<br>(especifique)_____ |                                         |
| _____                                               |                                         |
| _____                                               |                                         |
| _____                                               |                                         |

---

Información del entrenador:

36. Edad: \_\_\_\_\_

37. Género:

☐ F

☐ M

38. Años de experiencia como entrenador:

\_\_\_\_\_

39. Nivel de educación más alto que ha alcanzado:

☐ Escuela superior

☐ Bachillerato

☐ Maestría

☐ Doctorado

☐ Otro (especifique) \_\_\_\_\_

40. Actualmente, ¿posee una licencia de entrenador del Departamento de Recreación y Deportes?

☐ Sí   ☐ No

41. ¿Qué preparación tiene con respecto al entrenamiento en una buena mecánica de lanzamiento?

**Marque todas las que apliquen.**

☐ Adiestramiento sobre el entrenamiento de lanzadores por medio de talleres

☐ Ver entrenamientos de lanzadores por televisión

☐ Ver entrenamientos de lanzadores por internet

☐ Leer sobre entrenamientos de lanzadores por medio de libros

☐ Otro (especifique) \_\_\_\_\_
